# Supplementary material for: A three-lncRNA signature predicts clinical outcomes in low-grade glioma patients after radiotherapy
Source: publisher site journal article supplement (doi:10.18632/aging.103189), 2020-05-26
Supplement: Supplementary file [file aging-v12i10-103189-supplementary-material-SD1.pdf]

## SUPPLEMENTARY TABLE

Supplementary Table 1. 13 up-regulated lncRNAs and 24 down-regulated lncRNAs in radioresistant groups.

| lncRNA     | logFC    | logCPM   | PValue   | FDR      |
|------------|----------|----------|----------|----------|
| AC004832.1 | -6.5846  | 4.90548  | 7.74E-32 | 6.56E-28 |
| AL157831.2 | -6.08761 | 4.514612 | 3.66E-30 | 1.55E-26 |
| AC023796.1 | -7.49029 | 4.462543 | 1.92E-23 | 5.44E-20 |
| AL078605.1 | -2.58287 | 5.363397 | 1.39E-20 | 2.94E-17 |
| AC074351.1 | -2.14218 | 5.653697 | 1.12E-13 | 1.90E-10 |
| AC084816.1 | -2.69039 | 3.368313 | 7.68E-13 | 1.08E-09 |
| AC000061.1 | -4.78751 | 2.166427 | 2.20E-12 | 2.67E-09 |
| AC023886.1 | -2.10256 | 3.70055  | 7.94E-10 | 8.41E-07 |
| AL133372.2 | -3.36141 | 2.164238 | 1.15E-09 | 9.94E-07 |
| AL137005.1 | -3.42876 | 3.038507 | 1.17E-09 | 9.94E-07 |
| AC004870.2 | -2.3616  | 3.710813 | 2.45E-09 | 1.89E-06 |
| AC073324.2 | -2.5801  | 5.087589 | 6.55E-09 | 4.62E-06 |
| LINC02237  | -1.79369 | 2.355266 | 2.55E-07 | 0.000166 |
| LINC01479  | 4.373595 | 4.257885 | 4.55E-07 | 0.000273 |
| AC002384.1 | -3.02415 | 2.035558 | 4.83E-07 | 0.000273 |
| FAM30A     | -2.00246 | 3.185267 | 5.85E-07 | 0.00031  |
| AC046168.2 | -1.05344 | 6.818276 | 1.16E-06 | 0.000579 |
| MUC2       | 3.876152 | 4.10967  | 1.36E-06 | 0.000642 |
| AP000221.1 | -1.55528 | 3.12966  | 1.53E-06 | 0.000684 |
| AC022079.1 | -1.26838 | 3.289331 | 3.29E-06 | 0.001396 |
| KC6        | 3.413798 | 3.182956 | 4.12E-06 | 0.001664 |
| GS1-24F4.2 | -1.1294  | 4.07537  | 6.00E-06 | 0.00231  |
| AC022098.2 | 3.279784 | 3.071052 | 1.21E-05 | 0.004371 |
| LINC01163  | -1.3317  | 3.225518 | 1.24E-05 | 0.004371 |
| AC106786.1 | -1.50296 | 3.332785 | 1.68E-05 | 0.005714 |
| AC087241.4 | -1.51953 | 2.153561 | 2.51E-05 | 0.008182 |
| AP003083.1 | -1.285   | 5.43157  | 3.42E-05 | 0.010731 |
| AC020659.1 | 1.786279 | 4.027274 | 4.18E-05 | 0.012232 |
| AL133415.1 | 1.190541 | 4.741589 | 6.98E-05 | 0.019717 |
| DISC1FP1   | -1.64751 | 2.27533  | 7.98E-05 | 0.021447 |
| AC023905.1 | 3.127208 | 2.10345  | 8.10E-05 | 0.021447 |
| AC022498.1 | 1.522007 | 3.866576 | 9.02E-05 | 0.023175 |
| OTX2-AS1   | 3.50496  | 3.271446 | 0.000106 | 0.025632 |
| LINC01447  | 2.159006 | 5.885161 | 0.000157 | 0.036866 |
| AC092343.1 | 2.3475   | 2.50476  | 0.000186 | 0.042157 |
| LINC01239  | 1.585229 | 3.873012 | 0.000189 | 0.042157 |
| AC112487.1 | 1.523493 | 3.6163   | 0.000217 | 0.046079 |
